# Supplementary material
Source: ML conference proceedings conference paper supplement (https://openaccess.thecvf.com/content/ICCV2023/html/Ye_Self-Evolved_Dynamic_Expansion_ICCV_2023_paper.html)
Supplement: Supplementary file 1 [file Ye_Self-Evolved_Dynamic_Expansion_ICCV_2023_supplemental.pdf]

# Appendix for Self-Evolved Dynamic Expansion Model for Task-Free Continual Learning

August 18, 2023

## Contents

|                                                                                         |           |
|-----------------------------------------------------------------------------------------|-----------|
| <b>A Theoretical framework</b>                                                          | <b>2</b>  |
| A.1 Preliminary . . . . .                                                               | 2         |
| A.2 Theoretical guarantees . . . . .                                                    | 2         |
| A.3 The theoretical analysis for the expansion threshold . . . . .                      | 5         |
| <b>B Additional information for the proposed SEDEM</b>                                  | <b>5</b>  |
| B.1 Additional information for the difference between SEDEM and related works . . . . . | 6         |
| <b>C Additional information for experiment</b>                                          | <b>8</b>  |
| C.1 Additional information for the setting . . . . .                                    | 8         |
| C.2 Additional information for baselines . . . . .                                      | 9         |
| <b>D Additional results for the ablation study</b>                                      | <b>9</b>  |
| D.1 Dynamic expansion . . . . .                                                         | 10        |
| D.2 Memory buffer size . . . . .                                                        | 10        |
| D.3 Effects of the proposed sample selection . . . . .                                  | 11        |
| D.4 Effects of the proposed DEKMM . . . . .                                             | 12        |
| D.5 The knowledge diversity among experts . . . . .                                     | 12        |
| D.6 The effects of batch size . . . . .                                                 | 13        |
| D.7 Computational costs . . . . .                                                       | 13        |
| <b>E The comparison for the model’s complexity</b>                                      | <b>14</b> |

## A Theoretical framework

1 In this section, we propose a novel theoretical framework for analyzing the forgetting  
 2 behaviour of the model under TFCL. First, we give the problem definition and neces-  
 3 sary notations :

### 4 A.1 Preliminary

5 **Definition 1 (The distribution of the data stream.)** For a given data stream  $\mathcal{V} = \bigcup_{j=1}^n \mathcal{B}_j^r$ ,  
 6 let  $\mathbb{P}_{\mathbf{x}^r}$  represent the probabilistic representation of  $\mathcal{D}_r^S$ . Let  $\mathbb{P}_i$  represent the distribu-  
 7 tion of all previously learnt data batches  $\{\mathbb{B}_1^r, \dots, \mathbb{B}_i^r\}$  drawn from  $\mathcal{V}$  at  $\mathcal{S}_i$ .

**Definition 2 (The model risk and  $d_{\mathcal{H}\Delta\mathcal{H}}$  distance)** Let  $\mathcal{H}$  be a hypothesis space with  $d$   
 Vapnik–Chervonenkis (VC) dimension. For a given distribution  $\mathbb{P}_{\mathbf{x}^r}$ , the risk of a model  
 $h \in \mathcal{H}$  is defined as  $\mathcal{E}(h, \mathbb{P}_{\mathbf{x}^r}) \triangleq \mathbb{E}_{\{\mathbf{x}, y\} \sim \mathbb{P}_{\mathbf{x}^r}} [\tau(y, h(\mathbf{x}))]$ . For two given distributions  
 $\mathbb{P}_{\mathbf{x}^r}$  and  $\mathbb{P}_i$ , the  $d_{\mathcal{H}\Delta\mathcal{H}}$  distance between them is defined as :

$$d_{\mathcal{H}\Delta\mathcal{H}}(\mathbb{P}_{\mathbf{x}^r}(\mathbf{x}), \mathbb{P}_i(\mathbf{x})) \triangleq \sup_{(h, h') \in \mathcal{H}^2} \left| \mathcal{E}(h, h', \mathbb{P}_{\mathbf{x}^r}(\mathbf{x})) \right. \\ \left. - \mathcal{E}(h, h', \mathbb{P}_i(\mathbf{x})) \right|, \quad (1)$$

where  $\{h, h'\} \in \mathcal{H}$  and  $\mathcal{E}(h, h', \mathbb{P}_{\mathbf{x}^r})$  is defined as :

$$\mathcal{E}(h, h', \mathbb{P}_{\mathbf{x}^r}) \triangleq \mathbb{E}_{\{\mathbf{x}, y\} \sim \mathbb{P}_{\mathbf{x}^r}} [\tau(h'(\mathbf{x}), h(\mathbf{x}))] \quad (2)$$

8 where  $|\cdot|$  is the absolute value and  $\mathbb{P}_{\mathbf{x}^r}(\mathbf{x})$  is the marginal of  $\mathbb{P}_{\mathbf{x}^r}$ .

### 9 A.2 Theoretical guarantees

10 Learning more components into a dynamic expansion model would improve the per-  
 11 formance since it may capture more underlying data distributions. However, learning  
 12 many overlapping components would not improve the performance too much but lead  
 13 to unnecessary parameters. In this section, we study how to find a good trade-off be-  
 14 tween the model’s size (the number of components) and generalization performance.  
 15 One solution to induce a good trade-off is to promote the knowledge diversity among  
 16 components during the expansion. The primary motivation for this solution is that  
 17 maintaining the knowledge diversity among components can allow to capture more  
 18 underlying data distributions with a minimized number of parameters. The proposed

SEDEM can satisfy the above condition by two approaches : (1) The proposed dynamic expansion mechanism compares the knowledge similarity between each previously learnt component and the current component, which guides to expand the network architecture if the current component learns sufficiently novel knowledge. Such a mechanism can promote the information diversity among components. (2) The proposed novelty-aware sample selection approach encourages the current component to learn novel samples, which further promotes the knowledge diversity among components.

In the following, we provide the theoretical analysis to show why the knowledge diversity among components can lead to a good trade-off between the model's size and generalization performance.

**Assumption 1** Let  $\mathbf{Q} = \{Q_1, \dots, Q_c\}$  be a dynamic expansion model with  $c$  components at the training step ( $T_i$ ). Let  $\mathcal{S}_{a_j}$  be the training step that  $Q_j$  was trained on and  $\mathcal{C}_{a_j}$  was the associated memory buffer. We assume that (Eq.(7) of the paper) is the optimal component selection criterion. Then we can view the dynamic expansion model  $\mathbf{Q}$  as a single model  $h$  trained on all previously learnt memories  $\{\mathcal{C}_{a_1}, \dots, \mathcal{C}_{a_{c-1}}\}$  and the current memory  $\mathcal{C}_i$  at  $\mathcal{S}_i$ , where  $\mathcal{C}_{a_c} = \mathcal{C}_i$ . Let  $\mathbb{P}_{\mathcal{C}_{a_1}, \dots, a_{c-1}} \otimes \mathcal{C}_i$  represent the distribution of all finished memories  $\{\mathcal{C}_{a_1}, \dots, \mathcal{C}_{a_{c-1}}\}$  and the current memory  $\mathcal{C}_i$  at  $\mathcal{S}_i$ .

**Theorem 1.** Let  $\mathbb{P}_i$  represent the distribution of all previously learnt data batches drawn from  $\mathcal{V}$  at  $\mathcal{S}_i$ . Based on Assumption 1. we derive a GB with probability (at least  $1 - \delta$ ) at  $\mathcal{S}_i$  :

$$\begin{aligned} \mathcal{E}(h, \mathbb{P}_i) &\leq \mathcal{E}(h, h_{\mathcal{C}_{a_1}, \dots, a_{c-1}} \otimes \mathcal{C}_i, \mathbb{P}_{\mathcal{C}_{a_1}, \dots, a_{c-1}} \otimes \mathcal{C}_i) \\ &\quad + \frac{1}{2} d_{\mathcal{H}\Delta\mathcal{H}}(\mathcal{R}_{\mathbb{P}_i}, \mathcal{R}_{\mathcal{C}_{a_1}, \dots, a_{c-1}} \otimes \mathcal{C}_i) \\ &\quad + 4 \sqrt{\frac{2d \log(2m') + \log(\frac{2}{\delta})}{m'}} \\ &\quad + \mathcal{L}_{\text{Error}}(\mathbb{P}_i, \mathbb{P}_{\mathcal{C}_{a_1}, \dots, a_{c-1}} \otimes \mathcal{C}_i), \end{aligned} \tag{3}$$

where  $\mathcal{L}_{\text{Error}}(\mathbb{P}_i, \mathbb{P}_{\mathcal{C}_{a_1}, \dots, a_{c-1}} \otimes \mathcal{C}_i)$  is the optimal error defined as :

$$\mathcal{L}_{\text{Error}}(\mathbb{P}_i, \mathbb{P}_{\mathcal{C}_{a_1}, \dots, a_{c-1}} \otimes \mathcal{C}_i) = \min \{ \mathcal{E}(h^*, \mathbb{P}_i) + \mathcal{E}(h^*, \mathbb{P}_{\mathcal{C}_{a_1}, \dots, a_{c-1}} \otimes \mathcal{C}_i) \} \tag{4}$$

39 where  $h^*$  is the optimal classifier that minimizes the joint risk :

$$h^* = \arg \min_{h \in \mathcal{H}} \{ \mathcal{E}(h, \mathbb{P}_i) + \mathcal{E}(h, \mathbb{P}_{\mathcal{C}_{a_1, \dots, a_{c-1}} \otimes \mathcal{C}_i}) \} \quad (5)$$

40 The detailed proof can be found in [2].

41 **Remark.** We have several observations from Theorem 4 :

- 42 • The  $d_{\mathcal{H} \Delta \mathcal{H}}$  distance between  $\mathbb{P}_i$  and  $\mathbb{P}_{\mathcal{C}_{a_1, \dots, a_{c-1}} \otimes \mathcal{C}_i}$  plays an important role for  
43 the forgetting behaviour of  $h$ . As  $d_{\mathcal{H} \Delta \mathcal{H}}$  distance increases in Eq. (3),  $h$  would  
44 suffer from a significant degeneration in performance since RHS of Eq. (3) in-  
45 creases.  $\mathbb{P}_{\mathcal{C}_{k_1, \dots, k_{c-1}} \otimes \mathcal{C}_i}$  represents the information from all learnt memories and  
46 the current memory, where each memory is learnt by the associated component.  
47 Therefore, encouraging the knowledge diversity among components can allow  
48 each  $\mathbb{P}_{\mathcal{C}_{a_j}}$  to capture a different underlying data distribution, resulting in learn-  
49 ing more underlying data distributions with a suitable number of components.  
50 In contrast, if several components learn the overlapping knowledge and ignore  
51 other underlying data distributions,  $\mathbb{P}_{\mathcal{C}_{k_1, \dots, k_{c-1}} \otimes \mathcal{C}_i}$  would not capture more un-  
52 derlying data distributions of  $\mathbb{P}_i$  and thus lead to forgetting during the training.
- 53 • This theorem theoretically proves that the probabilistic diversity between trained  
54 components in a dynamic expansion model is crucial for relieving forgetting  
55 using a minimized number of parameters.

56 In the following, we provide theoretical analysis to show that the knowledge diver-  
57 sity among trained components can also improve the generalization performance.

58 **Theorem 2** For a given data stream  $\mathcal{V} = \bigcup_{j=1}^n \mathcal{B}_j^r$ , we assume that  $\mathcal{V}$  contains  $t$  different  
59 underlying data distributions. Let  $\mathbb{P}_j^{\mathcal{V}}$  represent a certain underlying data distribution.

60 Based on Assumption 1, we derive a GB with probability (at least  $1 - \delta$ ) at  $\mathcal{S}_i$  :

$$\begin{aligned} \sum_{j=1}^t \{ \mathcal{E}(h, \mathbb{P}_j^{\mathcal{V}}) \} &\leq \mathcal{E}(h, h_{\mathcal{C}_{a_1, \dots, a_{c-1}} \otimes \mathcal{C}_i}, \mathbb{P}_{\mathcal{C}_{a_1, \dots, a_{c-1}} \otimes \mathcal{C}_i}) \\ &+ \frac{1}{2} d_{\mathcal{H} \Delta \mathcal{H}}(\mathcal{R}_{\mathbb{P}_j^{\mathcal{V}}}, \mathcal{R}_{\mathcal{C}_{a_1, \dots, a_{c-1}} \otimes \mathcal{C}_i}) + 4 \sqrt{\frac{2d \log(2m') + \log(\frac{2}{\delta})}{m'}} \\ &+ \mathcal{L}_{\text{Error}}(\mathbb{P}_j^{\mathcal{V}}, \mathbb{P}_{\mathcal{C}_{a_1, \dots, a_{c-1}} \otimes \mathcal{C}_i}), \end{aligned} \quad (6)$$

61 From Eq. (6), it observes that as the proposed model learns more components over  
62 time, RHS of Eq. (6) would be reduced since the model gains more knowledge from the

data stream. Since the data stream has several different underlying data distributions, encouraging the knowledge diversity among components in the proposed model can help to capture these underlying data distributions with a fair number of parameters. The existing dynamic expansion models [8, 6, 11] fail to achieve the optimal trade-off between the model’s size and generalization performance since they do not take into account the diversity of components when performing the expansion.

### A.3 The theoretical analysis for the expansion threshold

In this section, we provide the theoretical analysis for the expansion threshold (Eq.(1) of the paper). As the expansion threshold  $\beta$  increases, we tend to employ less experts for learning, which can be explained by the following analysis.

$$\begin{aligned} \sum_{j=1}^t \{\mathcal{E}(h, \mathbb{P}_{t,j}^T)\} &\leq \sum_{j=1}^t \{\mathcal{E}(h, h_{\mathcal{C}_{a_1, \dots, a_{c-1}} \otimes \mathcal{C}_i}, \mathbb{P}_{\mathcal{C}_{a_1, \dots, a_{c-1}} \otimes \mathcal{C}_i}) \\ &\quad + \frac{1}{2} d_{\mathcal{H} \Delta \mathcal{H}}(\mathcal{R}_{\mathbb{P}_{t,j}^T}, \mathcal{R}_{\mathcal{C}_{a_1, \dots, a_{c-1}} \otimes \mathcal{C}_i}) + 4 \sqrt{\frac{2d \log(2m') + \log(\frac{2}{\delta})}{m'}} \\ &\quad + \mathcal{L}_{\text{Error}}(\mathbb{P}_{t,j}^T, \mathbb{P}_{\mathcal{C}_{a_1, \dots, a_{c-1}} \otimes \mathcal{C}_i})\}, \end{aligned} \tag{7}$$

We assume that  $\mathcal{D}_{t,j}^T$  has  $t$  number of underlying data distribution and each one is denoted as  $\mathbb{P}_{t,j}^T$ . A small number of experts would allow  $\mathbb{P}_{\mathcal{C}_{a_1, \dots, a_{c-1}} \otimes \mathcal{C}_i}$  to capture fewer knowledge and thus would lose the knowledge corresponding to several target distributions. In contrast, when we decrease the expansion threshold  $\beta$ ,  $\mathbb{P}_{\mathcal{C}_{a_1, \dots, a_{c-1}} \otimes \mathcal{C}_i}$  can capture more knowledge and can reduce the  $d_{\mathcal{H} \Delta \mathcal{H}}$  distance term, leading to a reduction in RHS of Eq. (7). Although, a small expansion threshold  $\beta$  can improve the generalization performance of the proposed model, it also leads to a large number of experts where some of them would capture the same underlying data distribution. An appropriate threshold  $\beta$  can allow the proposed model to employ fewer experts to learn more underlying data distributions, ensuring a good trade-off between the model’s size and generalization performance.

## B Additional information for the proposed SEDEM

In this section, we provide the pseudocode of the proposed SEDEM in Algorithm 1, which can summarized into four steps :

87 **Step 1. Sample selection :** We continually add the incoming data batches  $\mathcal{B}_i^r$  to  $\mathcal{C}_i$ , as  
 88  $\mathcal{C}_i = \mathcal{C}_{i-1} \cup \mathcal{B}_i^r$  at  $\mathcal{S}_i$ . If the memory buffer size is larger than  $\lambda$ , we perform the  
 89 sample selection by using Eq.(4) of the paper and then we perform **Step 2**.

90 **Step 2. Training SEDEM :** We build the first expert  $\mathcal{Q}_1$  into  $\mathbf{Q}$  in the beginning of the  
 91 training phase, and train it until  $\mathcal{S}_\lambda$  in order to preserve the initial information of a data  
 92 stream. The subsequent learning is described in Fig.2 of the paper, where we suppose  
 93 that we have already trained  $k$  experts and added them into  $\mathbf{Q}$  at  $\mathcal{S}_i$ . We only optimize  
 94 the current expert  $\mathcal{Q}_k$  by using the two loss functions :

$$\mathcal{L}_{cl} = -\frac{1}{\lambda} \sum_{j=1}^{\lambda} \left\{ \sum_{t=1}^C \{y_j^m(t) \log(p_j^k(t))\} \right\} \quad (8)$$

95

$$\mathcal{L}_{Vl} = -\frac{1}{\lambda} \sum_{j=1}^{\lambda} \left\{ \mathcal{L}_{VAE}(\mathbf{z}_j; G_{(\phi_k, \varphi_k)}) \right\}, \quad (9)$$

96 where  $p_j^k(t)$  is the SoftMax probability for the  $t$ -th class, predicted by using  $f_{\omega_k} \circ$   
 97  $k_{\gamma_k}(\mathbf{x}_j^m)$ .  $\mathbf{z}_j$  is the  $j$ -th feature vector extracted by using the feature extractor  $f_{\omega_k}$  of  
 98  $\mathcal{Q}_k$ . Eq. (8) and Eq. (9) are employed to train the classifier  $f_{\omega_k} \circ C_{\gamma_k}(\mathbf{x}_j^m)$  with the  
 99 mask parameters and the expert selector  $G_{(\phi_k, \varphi_k)}$  on  $\mathcal{C}_i$  at  $\mathcal{S}_i$ . Then we perform **Step 3**.

100 **Step 3 . Dynamic expansion :** To avoid the frequently checking the model expansion,  
 101 we only evaluate Eq.(1) of the paper if and only if the memory buffer is full  $|\mathcal{C}_i| = \lambda$   
 102 where  $|\mathcal{C}_i|$  is the number of memorized samples, If Eq.(1) of the paper is satisfied, we  
 103 add a new expert  $\mathcal{Q}_{k+1}$  to  $\mathbf{Q}$  and clear up the memory buffer  $\mathcal{C}_i$  in order to allow  $\mathcal{Q}_{k+1}$   
 104 to learn statistically non-overlapping samples. Then we return back to **Step 1**.

105 **Step 4 . Testing phase :** Once all  $\{\mathcal{S}_1, \dots, \mathcal{S}_n\}$  are completed, we perform the expert  
 106 selection by using Eq.(7) of the paper to select an appropriate expert for evaluating a  
 107 given input.

## 108 **B.1 Additional information for the difference between SEDEM and** 109 **related works**

110 In this section, we discuss the difference between the proposed SEDEM and several  
 111 related works. The first work related to this paper is proposed in [11], called On-  
 112 line Cooperative Memorization (OCM), which manages two memory buffers to store  
 113 the short and long-term information from a data stream. OCM can also be combined  
 114 with the dynamic expansion mechanism to further enhance its generalization perfor-  
 115 mance. There are several differences between OCM and SEDEM. First, OCM employs

---

**Algorithm 1** Training algorithm for SEMOE

---

```
1: (Input:The data stream);
2: for  $i < n$  do
3:    $\mathcal{B}_i^r \sim \mathcal{S}$ 
4:    $\mathcal{C}_i = \mathcal{C}_{i-1} \cup \mathcal{B}_i^r$ 
5:   Sample selection
6:   if  $|\mathcal{C}_i| > \lambda$  then
7:     for  $c < |\mathcal{C}_i|$  do
8:        $\mathbf{x}_j^m \sim \mathcal{C}_i$ 
9:        $\mathcal{L}_s(\mathbf{x}_j^m) \triangleq -\frac{1}{k-1} \sum_{h=1}^{k-1} \left\{ \sum_{t=1}^C \{y_j^m(t) \log(p_j^h(t))\} \right\}$ 
10:    end for
11:     $\mathcal{C}_i = \{\mathbf{x}_j^m \mid \mathcal{L}_s(\mathbf{x}_j^m) < \mathcal{L}_s(\mathbf{x}_{j+1}^m), j = 1, \dots, \lambda\}$ 
12:  end if
13:  Training the SEMOE
14:  if  $|\mathbf{Q}| = 1$  and  $i > \lambda$  then
15:     $\mathbf{Q} = \mathcal{Q}_2 \cup \mathbf{Q}$  Add the second expert.
16:  end if
17:   $k = |\mathbf{Q}|$ 
18:  Train the classifier of  $\mathcal{Q}_k$  on  $\mathcal{C}_i$  using  $\mathcal{L}_{cl}$ 
19:  Train the expert selector of  $\mathcal{Q}_k$  on  $\mathcal{C}_i$  using  $\mathcal{L}_{Vl}$ 
20:  Dynamic expansion
21:  if  $|\mathcal{C}_i| > \lambda$  then
22:    if  $\min \{\mathcal{L}_b(\mathcal{Q}_1, \mathcal{Q}_k), \dots, \mathcal{L}_b(\mathcal{Q}_{k-1}, \mathcal{Q}_k)\} \geq \beta$  then
23:       $\mathbf{Q} = \mathcal{Q}_{k+1} \cup \mathbf{Q}$  Add the second expert.
24:    end if
25:  end if
26: Testing phase
27: Perform the expert selection  $s^* = \arg \max_{s=1, \dots, k} \{\mathcal{L}_{VAE}(f_{\omega_s}(\mathbf{x}); G_{(\phi_s, \varphi_s)})\}$ 
28: Perform the evaluation
```

---

a dual memory system while SEDEM uses a single memory buffer. Second, OCM proposes a kernel-based sample selection approach that transfers necessary samples from short-term to long-term memory. The sample selection in SEDEM is based on the cross-entropy evaluation, which encourages the newly added component to learn novel knowledge. Finally, OCM detects the loss change as the expansion signal, which does not have theoretical guarantees. In contrast, the proposed SEDEM evaluates knowledge diversity among experts as the expansion signal, ensuring a compact model structure and having theoretical guarantees.

The second related work is called the Online Discrepancy Distance Learning (ODDL) [12] which introduces to estimate the discrepancy distance between the already learnt

126 knowledge and incoming samples and uses this result for the model expansion and  
127 sample selection. There are several differences between ODDL and SEDEM. First,  
128 the discrepancy-based expansion mechanism in ODDL requires performing the gener-  
129 ation (sampling) process for each component, leading to more computational costs. In  
130 contrast, the proposed expansion mechanism (Eq.(1) of the paper) directly estimates  
131 the knowledge diversity among experts using the memorized samples, as the expan-  
132 sion signal, which is more efficient than ODDL. Second, as similar to the expansion  
133 mechanism, the sample selection in ODDL also needs the sampling process for each  
134 component. In contrast, the proposed SEDEM employs the cross-entropy evaluation  
135 without the generation process for the sample selection, which is more efficient. Fi-  
136 nally, ODDL considers learning a VAE model on the image space while the proposed  
137 SEDEM trains each VAE model to learn the feature representation from each expert.  
138 Consequently, the proposed SEDEM enjoys faster inference at the testing phase than  
139 ODDL.

## 140 C Additional information for experiment

### 141 C.1 Additional information for the setting

142 **Network architecture and hyperparameter :** We adapt a small CNN network instead of  
143 ResNet-18 [4], used as the classifier for Split CIFAR10 and Split CIFAR100 in order  
144 to reduce the whole model size. We also use an MLP network with 2 hidden layers  
145 of 200 units [3] as the classifier for Split MNIST. We set the maximum memory size  
146  $\lambda$  as 2000, 1000, and 5000 for Split MNIST, Split CIFAR10, and Split CIFAR100,  
147 respectively.

148 **GPU hardware.** The GPU used for the experiments was GeForce GTX 1080. The op-  
149 erating system considered for experiments was Ubuntu 18.04.5.

150 **Split MNIST.** We divide MNIST which contains 60k training samples into five tasks,  
151 each consisting of images from two classes, in consecutive order of their displayed  
152 digits, while increasing the numbers represented in the images [3].

153 **Split CIFAR10.** We split CIFAR10 into five tasks where each task consists of samples  
154 from two different classes [3].

155 **Split CIFAR100.** We split CIFAR100 into 20 tasks where each task has 2500 examples  
156 from five different classes [7].

157 We adapt ResNet 18 [4] for Split CIFAR10 and Split CIFAR100. We use an MLP



network with 2 hidden layers of 400 units each [3] for Split MNIST.

158

## C.2 Additional information for baselines

159

In this section, we introduce several baselines in detail.

160

**Finetune** is a simple model, implemented by a classifier, which is directly trained on a new batch of images during TFCL.

161

162

**Gradient Episodic Memory (GEM)** [7] is a memory-based approach that would use the memory to store past samples. GEM is also required to access both the task label and class label during the training.

163

164

165

**Incremental Classifier and Representation Learning (iCARL)** [9] is a standard memory-based method used in a class incremental setup.

166

167

**reservoir\*** [10] is a memory-based approach that stores the observed sample into a memory buffer  $\mathcal{C}$  with probability  $|\mathcal{C}|/n$  where  $n$  is the number of stored samples, and  $|\cdot|$  represents the cardinality of a set.

168

169

170

**Dynamic-OCM** [11] is a dynamic expansion model which proposes an online cooperative memorization (OCM) approach. OCM manages two memory buffers, aiming to store short- and long-term knowledge during training. In addition, Dynamic-OCM detects the change of the loss value as expansion signals, which does not have theoretical guarantees.

171

172

173

174

175

**MIR** [7] introduces a retrieval strategy for the sample selection in the memory during the Online Continual Learning (OCL). However, the retrieval strategy in MIR requires evaluating the loss in each training session. This means that MIR requires modifying the retrieval strategy for different tasks such as classification or generation tasks. The proposed OCM does not change the sample selection strategy for different tasks since we evaluate the sample similarity in the given feature space using the kernel function from Eq. (16) from the paper.

176

177

178

179

180

181

182

**GSS** [1] formulates the sample selection process as a constraint reduction problem. GSS stores samples in a buffer based on the gradient information which requires to access the class labels and can not be applied in the unsupervised learning setting.

183

184

185

## D Additional results for the ablation study

186

In this section, we provide more ablation studies in order to investigate the effectiveness of each module of the proposed model.

187

188

| Methods         | Split MNIST  | Split CIFAR10 | Split CIFAR100 |
|-----------------|--------------|---------------|----------------|
| SEDEM-CoPE      | 97.63        | 50.82         | 23.75          |
| SEDEM-MIR       | 97.65        | 50.38         | 23.62          |
| SEDEM-reservoir | 97.98        | 50.35         | 22.97          |
| SEDEM-NoRS      | 97.29        | 50.14         | 22.85          |
| SEDEM-B1        | 97.42        | 52.98         | 22.74          |
| SEDEM           | <b>98.35</b> | <b>55.27</b>  | <b>24.85</b>   |

Table 1: The effectiveness of the proposed sample selection in SEDEM.

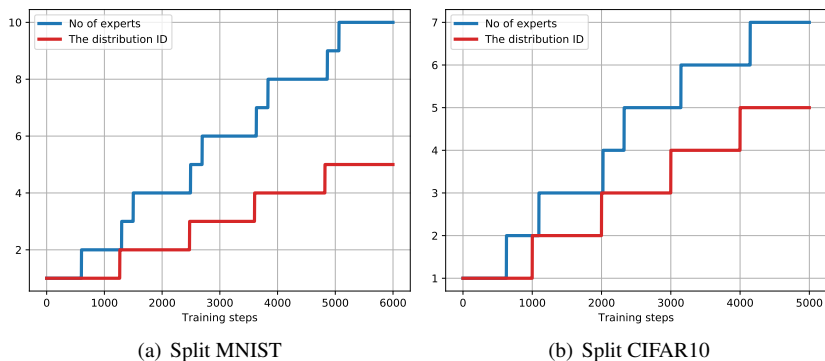

Figure 1: The number of experts of SEDEM and the distribution shift during the training.

## 189 D.1 Dynamic expansion

190 In this section, we investigate the performance of the proposed model when changing  
 191 the expansion threshold. First, we train the proposed model on Split MNIST and Split  
 192 CIFAR100 with different thresholds and the results are reported in Fig. 2. It observes  
 193 that a small threshold allows SEDEM to use fewer experts, which leads to degenerated  
 194 performance. In contrast, as increase the threshold, SEDEM creates more experts while  
 195 improving performance.

## 196 D.2 Memory buffer size

197 In this section, we train various models using different memory configurations. We  
 198 report the performance of various models in Fig. 3. It observes that the dynamic ex-  
 199 pansion model outperforms most static models on all memory configurations. Further-  
 200 more, the proposed approach outperforms other baselines under different memory sizes

| Methods                 | Split MNIST      | Split CIFAR10    | Split CIFAR100   |
|-------------------------|------------------|------------------|------------------|
| finetune*               | $19.75 \pm 0.05$ | $18.55 \pm 0.34$ | $3.53 \pm 0.04$  |
| MIR*                    | $93.20 \pm 0.36$ | $42.80 \pm 2.22$ | $20.00 \pm 0.57$ |
| GEM*                    | $93.25 \pm 0.36$ | $24.13 \pm 2.46$ | $11.12 \pm 2.48$ |
| iCARL*                  | $83.95 \pm 0.21$ | $37.32 \pm 2.66$ | $10.80 \pm 0.37$ |
| ER + GMED†              | $82.67 \pm 1.90$ | $34.84 \pm 2.20$ | $20.93 \pm 1.60$ |
| ER <sub>α</sub> + GMED† | $82.21 \pm 2.90$ | $47.47 \pm 3.20$ | $19.60 \pm 1.50$ |
| reservoir*              | $92.16 \pm 0.75$ | $42.48 \pm 3.04$ | $19.57 \pm 1.79$ |
| GSS*                    | $92.47 \pm 0.92$ | $38.45 \pm 1.41$ | $13.10 \pm 0.94$ |
| CoPE-CE*                | $91.77 \pm 0.87$ | $39.73 \pm 2.26$ | $18.33 \pm 1.52$ |
| CoPE*                   | $93.94 \pm 0.20$ | $48.92 \pm 1.32$ | $21.62 \pm 0.69$ |
| CURL*                   | $92.59 \pm 0.66$ | -                | -                |
| CNDPM                   | $95.36 \pm 0.18$ | $48.76 \pm 0.28$ | $22.52 \pm 1.26$ |
| WGF-SVGD                | -                | $47.90 \pm 2.50$ | $19.90 \pm 2.30$ |
| Dynamic-OCM             | $94.02 \pm 0.23$ | $49.16 \pm 1.52$ | $21.79 \pm 0.68$ |
| <b>SEDEM-NoRS</b>       | <b>97.29</b>     | <b>50.14</b>     | <b>22.85</b>     |

Table 2: Classification accuracy, representing the average of five independent runs, for the continuous learning of three datasets. \* and † denote the results cited from [3] and [5], respectively.

for each dataset. These results show that the proposed model is robust to the memory size change.

### D.3 Effects of the proposed sample selection

We investigate the effectiveness of the proposed sample selection by comparing with SEDEM that adopts other sample selection strategies, including CoPE, MIR and reservoir, resulting in several baselines such as SEDEM-CoPE, SEDEM-MIR and SEDEM-reservoir. We also create a baseline, SEDEM-NoRS, which does not employ the sample selection. We report the classification accuracy in Tab. 1. It observes that the proposed sample selection approach can allow SEDEM to perform better than other sample selection approaches. This is because the other sample selection approach does not encourage storing novel samples, which would learn the overlapping knowledge.

| Methods      | Split MNIST | Split CIFAR10 | Split CIFAR100 | Split MiniImageNet |
|--------------|-------------|---------------|----------------|--------------------|
| Dynamic-OCM  | 4.2M        | 68.0M         | 81.8M          | 70.0M              |
| CNDPM        | 4.6M        | 72.5M         | 86.6M          | 78.2M              |
| <b>SEDEM</b> | 3.5M        | 66.8M         | 79.2M          | 69.2M              |

Table 3: The number of parameters of various models under Split MNIST, Split CIFAR10 and Split CIFAR100

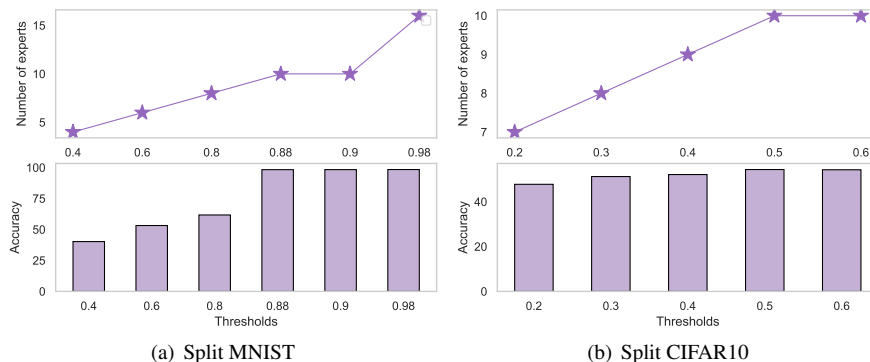

Figure 2: The performance of the proposed model when changing the expansion threshold.

## 212 D.4 Effects of the proposed DEKMM

213 In this section, we evaluate the effectiveness of the proposed DEKMM. We create a  
 214 baseline that does not use DEKMM, called SEDEM-B1. We report the results in Tab. 1.  
 215 The results show that the proposed DEKMM can further improve the performance of  
 216 SEDEM compared with the baseline.

## 217 D.5 The knowledge diversity among experts

218 We show the dynamic expansion of SEDEM trained on Split CIFAR10 in Fig. (1). It  
 219 observes that SEDEM can accurately detects the data distribution shift. In addition, a  
 220 single expert almost captures a unique underlying data distribution, demonstrating the  
 221 knowledge diversity among experts in SEDEM.

222 In addition, we also record the expansion signals (Left-Hand-Side (LHS) of Eq.(1)  
 223 of the paper) in each training step where we record the zero when SEDEM has only a  
 224 single expert. We train the proposed SEDEM under Split CIFAR10 and plot the results  
 225 in Fig. 4. It observes that the proposed SEDEM gives the low score (LHS of Eq.(1)  
 226 of the paper) when facing the data distribution shift. Such a low score indicates that

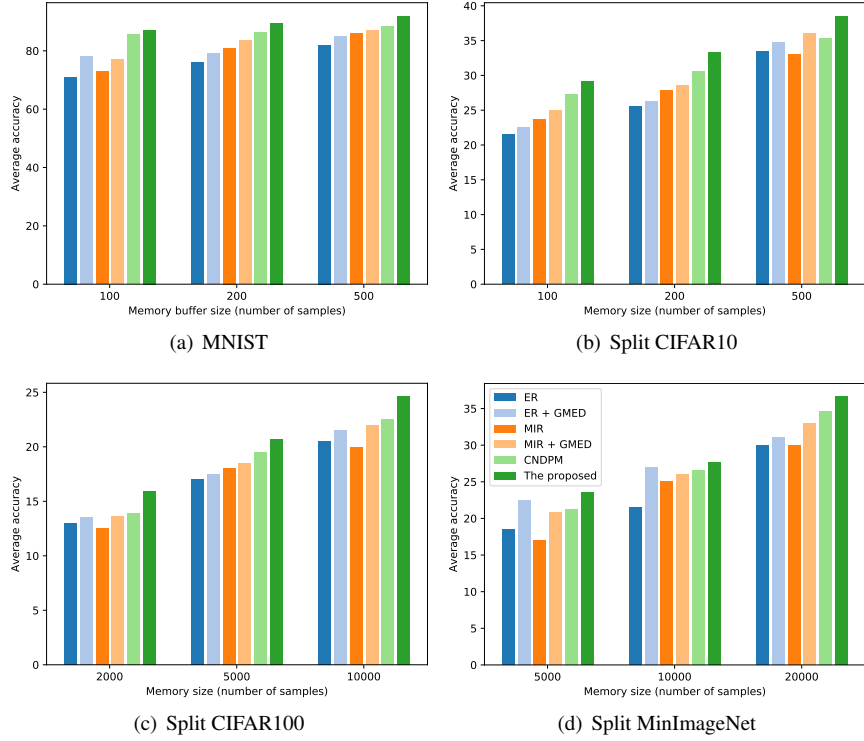

Figure 3: The performance of various models under different memory configurations.

the SEDEM performs the expansion to adapt to the data distribution shift, ensuring the knowledge diversity among the trained experts.

## D.6 The effects of batch size

In this section, we investigate the performance of the proposed SEDEM when changing the batch size. We train the proposed SEDEM by using the different batch size configurations and the results are reported in Fig. 5. These results show that the proposed SEDEM can maintain a stable performance when changing the batch size.

## D.7 Computational costs

In this section, we investigate the computational costs (training times) of various models for the classification task. We report the training times of various models in Tab. 4. It observes that the proposed SEDEM requires fewer training times than Dynamic-

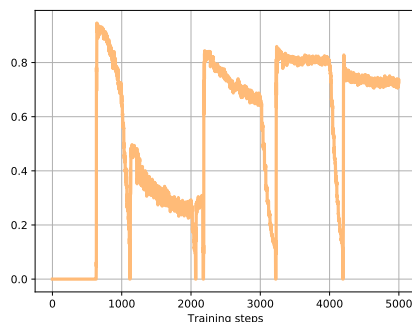

Figure 4: The expansion criterion of the proposed SEDEM under Split CIFAR10.

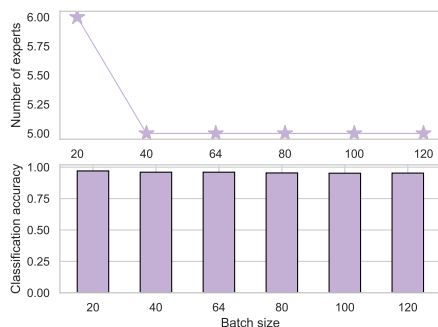

Figure 5: The performance of the proposed SEDEM on Split MNIST when changing the batch size.

238 OCM, which is also based on the dynamic expansion mechanism. In addition, SE-  
 239 DEM requires more training times than CNDPM since the proposed sample selec-  
 240 tion in SEDEM requires some computational costs. Furthermore, the SEDEM-NoRS,  
 241 which does not use the sample selection, requires less training times and perform better  
 242 than CNDPM, as shown in Tab. 2 and Tab. 4. These results indicate that the proposed  
 243 SEDEM still outperforms other baselines even if the proposed sample selection is not  
 244 used.

## 245 E The comparison for the model’s complexity

246 We report the number of experts of the proposed model and other existing dynamic  
 247 expansion models in Tab. 3. It observes that the proposed model achieves better per-  
 248 formance and employ fewer parameters compared with CNDPM and Dynamic-OCM.

| Methods     | Split MNIST | Split CIFAR10 | Split CIFAR100 |
|-------------|-------------|---------------|----------------|
| Dynamic-OCM | 10.2        | 42.3          | 47.8           |
| CNDPM       | 0.9         | 18.6          | 30.2           |
| SEMOE       | 5.6         | 32.5          | 38.9           |
| SEDEM-NoRS  | 0.8         | 16.9          | 26.5           |

Table 4: The training time of various models for the classification task.

## References

- [1] R. Aljundi, M. Lin, B. Goujaud, and Y. Bengio. Gradient based sample selection for online continual learning. In *Advances in Neural Information Processing Systems (NeurIPS)*, pages 11817–11826, 2019. 9
- [2] Shai Ben-David, John Blitzer, Koby Crammer, Alex Kulesza, Fernando Pereira, and Jennifer Wortman Vaughan. A theory of learning from different domains. *Machine learning*, 79(1):151–175, 2010. 4
- [3] Matthias De Lange and Tinne Tuytelaars. Continual prototype evolution: Learning online from non-stationary data streams. In *Proc. of the IEEE/CVF International Conference on Computer Vision (CVPR)*, pages 8250–8259, 2021. 8, 9, 11
- [4] K. He, X. Zhang, S. Ren, and J. Sun. Deep residual learning for image recognition. In *Proc. of IEEE Conf. on Computer Vision and Pattern Recognition (CVPR)*, pages 770–778, 2016. 8
- [5] Xisen Jin, Arka Sadhu, Junyi Du, and Xiang Ren. Gradient-based editing of memory examples for online task-free continual learning. In *Advances in Neural Information Processing Systems (NeurIPS)*, *arXiv preprint arXiv:2006.15294*, 2021. 11
- [6] Soochan Lee, Junsoo Ha, Dongsu Zhang, and Gunhee Kim. A neural Dirichlet process mixture model for task-free continual learning. In *Int. Conf. on Learning Representations (ICLR)*, *arXiv preprint arXiv:2001.00689*, 2020. 5
- [7] David Lopez-Paz and Marc’Aurelio Ranzato. Gradient episodic memory for continual learning. In *Advances in Neural Information Processing Systems*, pages 6467–6476, 2017. 8, 9

- 273 [8] Dushyant Rao, Francesco Visin, Andrei A. Rusu, Yee Whye Teh, Razvan Pas-  
274 canu, and Raia Hadsell. Continual unsupervised representation learning. In *Proc.*  
275 *Neural Inf. Proc. Systems (NIPS)*, pages 7645–7655, 2019. 5
- 276 [9] Sylvestre-Alvise Rebuffi, Alexander Kolesnikov, Georg Sperl, and Christoph H  
277 Lampert. iCaRL: Incremental classifier and representation learning. In *Proc.*  
278 *of the IEEE Conf. on Computer Vision and Pattern Recognition (CVPR)*, pages  
279 2001–2010, 2017. 9
- 280 [10] Jeffrey S Vitter. Random sampling with a reservoir. *ACM Transactions on Math-*  
281 *ematical Software (TOMS)*, 11(1):37–57, 1985. 9
- 282 [11] Fei Ye and Adrian G. Bors. Continual variational autoencoder learning via online  
283 cooperative memorization, 2022. 5, 6, 9
- 284 [12] Fei Ye and Adrian G Bors. Task-free continual learning via online discrep-  
285 ancancy distance learning. *Advances in Neural Information Processing Systems*,  
286 35:23675–23688, 2022. 7
